1 **Title:** Divergence in gut microbial communities mirrors a social group fission event in  
2 a black-and-white colobus monkey (*Colobus vellerosus*)

3 **Running title:** Microbiome divergence mirrors group fission

4  
5 **Authors:** Claire K. Goodfellow<sup>1,2</sup>, Tabor Whitney<sup>2</sup>, Diana M. Christie<sup>1,3</sup>, Pascale Sicotte<sup>4</sup>, Eva  
6 C. Wikberg<sup>5\*</sup> Nelson Ting<sup>1,3\*</sup>

7 **Author Affiliations:**

8 1. Institute of Ecology and Evolution, University of Oregon, Eugene, OR 97405, USA

9 2. Department of Biology, University of Oregon, Eugene, OR 97405, USA

10 3. Department of Anthropology, University of Oregon, Eugene, OR 97405, USA

11 4. Department of Anthropology and Archaeology, University of Calgary, Calgary, AB

12 T2N1N4, Canada

13 5. Department of Anthropology, University of Texas San Antonio, San Antonio, TX 78249,

14 USA

15 \*. Wikberg and Ting should be considered co-senior/co-corresponding authors

16

17 **ABSTRACT**

18 Host behavior and social factors have increasingly been implicated in structuring the  
19 composition of gut microbial communities. In social animals, distinct microbial communities  
20 characterize different social groups across a variety of taxa, although little longitudinal research  
21 has been conducted that demonstrates how this divergence occurs. Our study addresses this  
22 question by characterizing the gut microbial composition of an African Old World monkey, the  
23 black-and-white colobus (*Colobus vellerosus*), prior to and after a social group fission event. Gut

24 microbial taxonomic composition of these monkeys was profiled using the V-4 hypervariable  
25 region of the bacterial 16s rRNA gene, and pairwise-relatedness values were calculated for all  
26 individuals using 17 STR loci and partial pedigree information. The two social groups in this  
27 study were found to harbor distinct microbial signatures after the fission event from which they  
28 emerged, while these communities were not divergent in the same individuals prior to this event.  
29 Three genera were found to differ in abundance between the two new social groups:  
30 *Parabacteroides*, *Coprococcus*, and *Porphyromonadaceae*. Additionally, although this fission  
31 happened partially along lines of relatedness, relatedness did not structure the differences that we  
32 found. Taken together, this study suggests that distinct gut microbial profiles can emerge in  
33 social groups in less than one year and recommends further work into more finely mapping the  
34 timescales, causes, and potentially adaptive effects of this recurring trend toward distinct group  
35 microbial signatures.

36

37 **Keywords:** gut microbiome, group fission, social groups, sociality

38

39 **Research highlights:**

- 40 • Distinct gut microbial profiles emerge in two social groups of *C. vellerosus* less than nine  
41 months after a fission event.
- 42 • Three genera differ in abundance between the two new social groups.
- 43 • Relatedness does not structure differences in microbial composition between the groups.

44

45

## INTRODUCTION

46           The mammalian gut harbors a dynamic microbial community which contributes to host  
47 physiology, metabolism, and defense (Huttenhower *et al.*, 2012; Cho & Blaser, 2012;  
48 Barbachano *et al.*, 2017). This community both shapes host phenotypes and is shaped by host  
49 characteristics that can include phylogeny, genetic variation, environment, and spatial  
50 distribution (Wu *et al.*, 2011; Leamy *et al.*, 2014; Barelli *et al.*, 2015; Amato, 2013; Amato *et al.*,  
51 2016). Moreover, behavior and social context can contribute to gut microbiome composition, and  
52 diet choice, habitat use, mate choice, and social networks have all been shown to modulate gut  
53 diversity (Archie *et al.*, 2015; Ezenwa *et al.*, 2012). In fact, the social transmission of beneficial  
54 microbes has been cited as one of the benefits associated with group living (Lombardo, 2008),  
55 and it has been suggested that more similar gut communities between hosts may confer similar  
56 “ecosystem services” to their hosts (Costello *et al.*, 2012). Given that conspecifics in the same  
57 social group likely encounter highly comparable ecological challenges, the social transmission  
58 and ultimate convergence of a group’s gut microbiota into the consortia that provides the most  
59 ideal ecosystem services for that particular group’s set of demands could prove to be of  
60 evolutionary benefit.

61           Distinguishing the complex and intertwined forces that shape this dynamic community,  
62 however, is difficult. Studies of wild populations can help to address this difficulty, providing  
63 insight into the forces at play in natural communities as well as how they change over time  
64 (Amato, 2013). In particular, studies of wild primates and other highly social animals allow us to  
65 answer important questions about how social forces shape these changes in some of our own  
66 closest living relatives. For example, in a number of wild primate populations, more closely  
67 associated individuals have more homogenous gut microbiome compositions (Perofsky *et al.*,  
68 2017; Moeller *et al.*, 2016; Amato *et al.*, 2017) and distinct gut microbiota characterize different

69 social groups in the same population (Tung *et al.*, 2015; McCord *et al.*, 2014; Bennett *et al.*,  
70 2016; Springer *et al.* 2017; Degnan *et al.*, 2012). Taken together, these findings highlight the  
71 importance of social context in gut microbiome composition. Furthermore, immigrant males  
72 which have resided in a new social group for a longer period of time have more similar gut  
73 microbiota to the resident males of that group, suggesting that the convergence of group member  
74 microbiota may occur over a span of months to years (Grieneisen *et al.*, 2017). Because dietary  
75 shifts typically alter the composition of microbial communities over a shorter time scale of days  
76 to weeks, this finding suggests that distinct group communities are not solely the result of  
77 changes in diet (Bonte *et al.*, 2012; Williams *et al.*, 2012; Turnbaugh *et al.*, 2009). However,  
78 further studies are needed to more thoroughly examine the time scales over which these  
79 convergences occur in natural communities.

80         Group fission events provide an ideal natural system for interrogating such questions.  
81 These are a means of group proliferation in social animals that occur when the costs of living in a  
82 certain group have grown to outweigh the benefits (Sueur & Maire, 2014). When this happens,  
83 one or more social groups will break off from the original group, oftentimes splitting along lines  
84 of relatedness (Widdig *et al.*, 2006; Snyder-Mackler *et al.*, 2014). This type of event provides us  
85 the opportunity for unique insight into the physiological and behavioral changes in individuals  
86 following such an event as well as the time scales over which they occur. For example, fission  
87 events and variations in group size have enabled insight into the effects of social context on  
88 grooming networks, fertility and cortisol levels in primates (Henzi *et al.*, 1997; Dunbar, 2018;  
89 Markham *et al.*, 2015). Here, we report on the gut microbiome compositions of a group of ursine  
90 colobus or white-thighed black-and-white colobus (*C. vellerosus*) before, and less than a year  
91 after, a fission event. The aim of this study was to examine the plasticity of the gut microbiome

92 shortly following a fission event as a way of gaining insight into the time scale over which  
93 microbiomes diverge into the distinct microbiomes that have been shown to characterize  
94 different social groups.

95

## 96 **METHODS**

### 97 *Study system*

98 The Boabeng-Fiema Monkey Sanctuary (BFMS) is a 1.92 km<sup>2</sup> dry semi-deciduous forest  
99 (Hall & Swaine, 1981) located in central Ghana (7°43' N and 1°42'W). URSINE colobus or white-  
100 thighed black-and-white colobus (*Colobus vellerosus*) is one of two diurnal primate species that  
101 resides at BFMS (Saj *et al.*, 2005). This is an arboreal, folivorous monkey (Saj & Sicotte 2007a,  
102 2007b) that lives in uni-male or multi-male multi-female groups of 9-38 animals (Kankam &  
103 Sicotte, 2013; Wong & Sicotte, 2006). Dispersal is male-biased in this species (Teichroeb *et al.*,  
104 2011), although females do show facultative dispersal (Teichroeb *et al.*, 2009; Teichroeb *et al.*,  
105 2011; Wikberg *et al.*, 2012; Sicotte *et al.*, 2017). Female social networks are affected by the  
106 presence of infants, kinship, and immigration status, but not by dominance rank (Wikberg *et al.*,  
107 2013; Wikberg *et al.*, 2014a; Wikberg *et al.*, 2014b; Wikberg *et al.*, 2015). Several groups of *C.*  
108 *vellerosus* have been followed systematically since 2000 for behavioral, demographic and  
109 ecological data (see for example Teichroeb & Sicotte, 2009; Bădescu *et al.*, 2015). Fecal samples  
110 were collected on a regular basis from each focal female in our study groups between 2006 and  
111 2009 (see for example Wikberg *et al.*, 2015). This study follows the fission of one social group  
112 into two daughter groups (named NP and DA) over the course of one year (2006-2007).

113

114 *Ethical note*

115 This study was approved by the University of Calgary's Animal Care Committee, and  
116 conducted with permission from the Ghana Wildlife Division and the management committee at  
117 BFMS. This research adhered to the American Society of Primatologists' Principles for the  
118 Ethical Treatment of Non Human Primates.

119

### 120 *Sample collection and STR genotyping*

121 All fecal samples from the study period were collected using masks, fresh gloves, sterile  
122 sticks, and sterile tubes to minimize contamination. 1-2 grams of feces were mixed with 6  $\mu$ L of  
123 RNAlater® (Thermo Fisher Scientific, Waltham MA) immediately upon collection and stored at  
124 -20°C in the field. After shipment to the Ting lab, samples were again stored at -20°C until DNA  
125 extraction. DNA was extracted from two or more samples of each individual using a QIAamp  
126 DNA Stool Mini Kit with a slightly modified manufacturer protocol (Wikberg *et al.*, 2012), and  
127 negative controls were processed with each round of extraction. 17 short tandem repeat (STR)  
128 loci were amplified using Qiagen's multiplex PCR kit with a modified protocol and analyzed on  
129 an ABI 3730 DNA analyzer (following Wikberg *et al.*, 2012). We determined how many  
130 replicates were needed to confirm homozygote genotypes based on real-time PCR DNA  
131 quantification (Morin *et al.*, 2001). Two replicates were used to confirm heterozygote genotypes.

132

### 133 *Gut microbial profiling*

134 We collected metagenomic data from matched genotyped samples from female members  
135 of the original social group collected from June to August, 2006 (n = 12 samples) and from  
136 matched genotyped samples from the same female individuals residing in the two daughter  
137 groups from July to August, 2007 (NP with n = 6 samples; DA with n = 6 samples). DNA was

138 extracted again as above and quantified using a Qubit dsDNA BR Assay Kit protocol using a  
139 Qubit 2.0 Fluorometer (Thermo Fisher Scientific, Waltham MA). Samples containing at least 1.0  
140 ng/ $\mu$ L were chosen for preparation and sequencing of the V-4 hypervariable region of the  
141 bacterial 16S ribosomal RNA gene in the Genomics and Cell Characterization Core Facility at  
142 the University of Oregon. 200 ng of DNA diluted in 10  $\mu$ L of H<sub>2</sub>O were PCR amplified using  
143 barcoded Illumina 515F and 806R primers. Targets were amplified in reactions of 1  $\mu$ L DNA,  
144 1.25  $\mu$ L of 10  $\mu$ M primer mix, 10.25  $\mu$ L H<sub>2</sub>O, and 12.5  $\mu$ L NEB Q5 hot start 2x Master Mix.  
145 The thermal cycling profile was as follows: initial denaturing at 98°C for 0:30, 20-30 cycles of  
146 98°C for 0:10, 61°C for 0:20, and 72°C for 0:20, and a final extension of 72°C for 2:00. PCR  
147 products were cleaned using Ampure XP beads (Beckman Coulter, Brea, CA), quantified and  
148 normalized. Barcoded amplicons were pooled and pair-end sequenced with 150 base pair reads  
149 on a partial medium output run on the Illumina NextSeq platform. Sequences were then  
150 demultiplexed and denoised using DADA2 (Bolger *et al.*, 2014). Taxonomic units were assigned  
151 using the Qiime2 pipeline. An OTU table was generated for samples rarefied to an even  
152 sampling depth of 46,040 reads per sample, retaining 1,104,960 sequences for 24 samples.  
153 Negative controls were processed at both the extraction and library preparation (PCR) stages,  
154 and they were sequenced and carried through the data processing pipelines. No evidence of  
155 contamination was found via fluorometry or gel electrophoresis during laboratory work, nor was  
156 there any evidence of contaminating sequences in the Illumina reads for the negative controls.

157

### 158 *Data Analyses*

159 Unless otherwise noted, all subsequent statistical analyses were run in R. To test whether  
160 average gut microbial composition differed by social group, samples were analyzed using four

161 groups based on social group at the time of sample collection: original group which became NP  
162 after the fission, original group which became DA after the fission, DA, and NP. Beta diversity  
163 was calculated for the samples as Bray-Curtis dissimilarity using the *phyloseq* package for R  
164 (McMurdie & Holmes, 2013). This metric was selected over metrics accounting for evolutionary  
165 relatedness as it represents a quantitative measure of community dissimilarity based on relative  
166 abundance without adjusting for the phylogenetic proximity of OTUs, thereby allowing insight  
167 into structure without accounting for relatedness among microbial taxa. We also ran a  
168 PERMANOVA using the *adonis* function in the *vegan* package, with social group (pre-fission  
169 DA, pre-fission NP, post-fission DA, post-fission NP), age class (subadult, adult), collection site  
170 (mature forest, woodland), and reproductive status of the individual (cycling, non-cycling,  
171 pregnant, lactating) as predictors in the model. Linear effect size analysis (LefSe) was run for the  
172 groups before and after the fission event at a KW alpha value of 0.01 and an LDA score of 3.0  
173 (Segata *et al.*, 2011).

174 To assess whether the fission occurred along lines of host relatedness, we calculated  
175 relatedness following Wikberg *et al.* (2012). A Kruskal-Wallis test was run using metrics of  
176 average group relatedness for the three social groups (original group, DA, NP). Finally, we  
177 determined whether host relatedness explained differences in gut microbial beta diversity seen  
178 between groups. We investigated the correlation between the Bray-Curtis dissimilarity matrix  
179 and the host relatedness matrix for each group using Mantel tests, and Spearman rank correlation  
180 statistics were computed with 999 permutations.

181

182

## RESULTS



183           In the summer of 2006, one of our study groups (28 individuals) showed elevated levels  
184 of female aggression. Subgroups started to range 50 meters apart for periods of time, although  
185 the subgroups always convened during the day (Wikberg, unpublished data). *C. vellerosus*  
186 typically exhibit a smaller group spread, and 50 meters is used to define a between-group  
187 encounter in this species (Sicotte & MacIntosh, 2004). The home range of the original group  
188 spanned approximately 0.20 km<sup>2</sup> through both woodland and mature forest. By May of 2007, this  
189 group had fissioned into two daughter groups: NP (10 individuals) and DA (18 individuals)  
190 (Table 1). These two groups both remained on the original home range, splitting the range after  
191 the fission (Fig. 1). Both daughter groups ranged in subsets of the original range that included  
192 both woodland and mature forest, but DA ranged 0.15 km<sup>2</sup>, moreso in woodland areas, while  
193 NP's new range was 0.054 km<sup>2</sup>, moreso in mature forest after the fission event.

194           The original group was broken down into two groups for the sake of analysis—those  
195 female individuals which eventually split into the DA group and those females that split into the  
196 NP group. Average Bray-Curtis dissimilarity was 0.527 (SD +/- 0.046) for the two groups before  
197 the fission event, while it was 0.538 (SD +/- 0.048) for the two social groups after the fission  
198 event. In the PERMANOVA, age class ( $p = 0.378$ ,  $df = 1$ ,  $F = 1.028$ ), collection site ( $p = 0.482$ ,  
199  $df = 2$ ,  $F = 0.992$ ), and reproductive status ( $p = 0.790$ ,  $df = 2$ ,  $F = 0.860$ ) were not significant  
200 predictors of Bray-Curtis dissimilarity, but social group was a significant predictor ( $p = 0.001$ ,  $df$   
201  $= 3$ ,  $F = 4.416$ ). Pairwise comparisons indicated that Bray-Curtis dissimilarity between the two  
202 social groups was not significant prior to the fission ( $p = 0.085$ ,  $n = 12$ , pseudo  $F = 1.23$ ), while  
203 differences after the fission were significant ( $p = 0.02$ ,  $n = 12$ , pseudo  $F = 1.62$ ). Significant  
204 differences were also found between the 2006 and 2007 sampling periods for all groups sampled  
205 ( $p < 0.01$ ,  $n = 24$ , pseudo  $F = 2.19$ ). Group membership explained 7.0% of the variation in gut

206 microbiome diversity, while the largest predictor of variation was sampling year (2006 vs. 2007),  
207 explaining 31.4% of the variation in diversity (Fig. 2).

208         The average pairwise-relatedness among females in the social group prior to the fission  
209 was 0.153, while it was 0.232 in the post-fission NP group and 0.125 in the post-fission DA  
210 group (Fig. 3). This average pairwise-relatedness increased by 0.079 in the NP social group from  
211 the original DA group, suggesting that this fission event may have happened partially along lines  
212 of female relatedness, with a group of more closely-related female individuals splitting off to  
213 form the new NP group. However, the average pairwise-relatedness decreased by 0.028 between  
214 the pre-fission group and the new DA group. The pairwise-relatedness was not statistically  
215 different between any of the groups ( $p = 0.103$ ,  $df = 2$ ,  $\chi^2 = 4.5518$ ). The Mantel test comparing  
216 Bray-Curtis dissimilarity and relatedness showed no statistically significant correlation between  
217 these variables ( $r < 0.01$ ,  $p = 0.494$ ).

218         On the whole, individual gut samples were vastly dominated by Firmicutes (57-78%) and  
219 Bacteriodes (2-13%). The next most prevalent phyla across samples were Tenericutes (3-10%)  
220 and Verucomicrobia (<1-16%). Linear discriminant effect analysis (LefSe) found no differences  
221 between the groups prior to the fission and three genera to differ between the two new social  
222 groups after the fission: *Parabacteroides*, *Coprococcus*, and *Porphyromonadaceae* (Fig. 4).

223

224

## DISCUSSION

225         Distinct gut microbiota characterize different social groups across a wide range of taxa  
226 (Bennett *et al.*, 2016; Degnan *et al.*, 2012; Tung *et al.*, 2015; Amato *et al.*, 2017). Examining the  
227 process and the time scale over which these divergences occur is important to understand the  
228 influence that social context can exert on gut microbiome assembly. Some recent research has

229 focused on the time scale across which an individual's microbiome converges with that of a new  
230 social group. Grieniesen *et al.* (2017) found that the longer an immigrant male baboon resided in  
231 a new social group, the more closely his core and non-core microbiomes resembled those of the  
232 adult members of that group, suggesting that the process of group convergence takes place over a  
233 span of months to years. Amaral *et al.* (2017) also found that, when newly-weaned infants joined  
234 new social groups, their gut microbiomes converged to resemble their new groups within two  
235 weeks. Our study focuses on the time scale across which social groups diverge from one another.  
236 We found distinct gut microbial signatures to characterize two daughter groups of colobus less  
237 than nine months after the fission event that resulted in these groups. Prior to this fission, the  
238 same individuals did not harbor distinct microbial communities, although the difference between  
239 them did approach significance. This trend may be due to sampling the original group at a  
240 timepoint during the initial stages of the fission event. Taken together, this finding both indicates  
241 that distinct gut microbial profiles can emerge in two new social groups in less than nine months  
242 and suggests that the process of group-specific microbial divergence may begin prior to the  
243 establishment of those groups. Additional timepoints leading up to and following a fission event  
244 are needed to more finely map the timescale across which these communities diverge and to  
245 better understand the mechanisms driving divergence.

246         Hosts can gain microbes through changes in social context, such as alterations in direct  
247 and indirect interactions with conspecifics that provide access to different microbes, potentially  
248 affecting gut microbiome composition (Lombardo *et al.*, 2008). In social animals, changes in  
249 group composition, size, and social networks could all contribute to this type of shift. In this  
250 study, group composition of females before and after the fission remained similar overall (Table  
251 1); thus the number and age structure of females in each fission product are unlikely to be

252 driving our results. There were, however, other changes in social context in DA social group  
253 during the post-fission field season, including two males immigrating to DA group and one  
254 infant dying. Further investigation into how changes in social environment and social stress  
255 affect the gut microbiome are required to determine how these events may have influenced the  
256 observed gut microbiome divergence.

257 Other factors potentially contributing to the observed microbial shifts are diet and/or  
258 ranging patterns. While diet has been suggested as a primary driver in structuring the gut  
259 microbiome (Muegge *et al.*, 2011; Amato *et al.*, 2014; Hale *et al.*, 2018), diet has not been found  
260 to explain differences in gut microbial beta diversity between individuals and groups in our  
261 population (Wikberg *et al.*, 2017; Wikberg unpublished data). Alternatively, despite all females  
262 in NP and DA group using a distinct part of their group's home range as well as a large overlap  
263 zone between the two groups (Fig. 1) and collection site being a non-significant predictor  
264 variable for gut microbial dissimilarity, we cannot rule out the effects of habitat use on the  
265 observed shifts. While product groups ranged in subsets of the original range that included both  
266 woodland and mature forest, DA ranged primarily in woodland areas after the fission while NP's  
267 new range tended toward the mature forest. Because even small changes in environment can  
268 expose animals to new reservoirs of environmentally-derived microbes, it is possible that the  
269 divergence observed between the two product groups is in part driven by spatial distribution and  
270 habitat use.

271 As has been reported in other folivorous species, individual gut samples were vastly  
272 dominated by Firmicutes and Bacteriodes with low but consistent proportions of Tenericutes and  
273 Verucomicrobia (Yildirim *et al.*, 2010; Amato *et al.*, 2016). Linear discriminant analysis (LefSe)  
274 revealed three genera to differ between the two product groups of this study. The new DA group

275 was found to have relatively more *Porphyromonadaceae* and *Parabacteriodes* than the NP group  
276 after the fission, while the genus *Coprococcus* was found to be at greater prevalence in the NP  
277 group than the new DA group. The *Coprococcus* genus is in the order Clostridiales, which can  
278 assist in the degradation of plant material and is likely to reflect the folivorous diet of these  
279 animals (Barelli *et al.*, 2015). It has been found at differential abundances in different social  
280 groups of baboons, suggesting that this might be a genus with a strong propensity for social  
281 transmission (Grieneisen *et al.*, 2017). This genus is also commonly used to gauge individual gut  
282 health, and decreased levels of *Coprococcus* have been shown to accompany a stress response  
283 (Derrien *et al.*, 2015), which could be related to the changes in social context and/or increased  
284 ranging in woodland habitat seen in the DA social group. Because quadrats characterized as  
285 “woodland” at BFMS have been previously found to have fewer large trees, less species  
286 diversity, and a lower basal area of colobus food trees than those in the interior of the forest  
287 (Teichroeb & Sicotte, 2018), it is possible that the DA group’s increased ranging in this type of  
288 habitat may partially account for the elevated levels of *Coprococcus* observed in this group.  
289 While our analyses showed that collection site (woodland forest vs. mature forest) was not found  
290 to be a significant predictor of variation in this study, more detailed study on the effects of  
291 ranging patterns and habitat use are required.

292 This fission event resulted in an increase in average pairwise-relatedness for the NP and a  
293 decrease for the DA group, although there were no significant differences in mean relatedness  
294 between the original group and the post-fission groups. This is a common phenomenon in  
295 animals that disperse by group fission, and an increase in relatedness in fission product groups  
296 has been demonstrated widely across primate species (Widdig *et al.*, 2006; Snyder-Mackler *et*  
297 *al.*, 2014). Although genetic variation can play a significant role in shaping the diversity of the

298 gut microbiome (Goodrich *et al.*, 2014), previous studies have found little evidence for a strong  
299 role of host genetics in structuring the microbial communities of wild primates (Degnan *et al.*,  
300 2012; Amato *et al.*, 2017; Spor *et al.*, 2011). In this particular data set, no correlation existed  
301 between beta diversity and relatedness. Taken together, our results suggest that even though NP  
302 group contained some close female kin dyads, relatedness did not play a significant role in  
303 structuring the differences in beta diversity seen between the two groups.

304 Finally, the largest proportion of variation between groups in this study was explained by  
305 year, rather than group membership. Previous studies have found temporal variation in the gut  
306 microbiomes of other folivorous primates to change in response to seasonal changes in food  
307 availability (Amato *et al.*, 2015; Springer *et al.* 2017), which is consistent with past observations  
308 in this study population (Wikberg *et al.*, 2016, Wikberg unpublished data). However, because  
309 longitudinally collected samples in this study were all from the wet season, the observed  
310 differences would need to be explained by some aspect of interannual variation in food  
311 availability during the same season. Further work is needed to clarify this possibility, including  
312 more sampling points between years and seasons as well as detailed data on changes in diet and  
313 food availability through time.

314 Overall, we used a longitudinal approach that provides a new perspective into how social  
315 groups acquire distinct gut microbial communities and the time period over which these  
316 divergent communities establish. This has significant consequences for understanding the role of  
317 social context in shaping the unique microbial signatures associated with distinct social groups  
318 across a wide variety of taxa. Further work is recommended into more finely mapping the  
319 timescales and factors that result in this divergence, especially within the context of the  
320 potentially adaptive effects of this recurrent, social-context dependent trend.

321

322

## ACKNOWLEDGEMENTS

323 We confirm that all research protocols reported in this manuscript were reviewed and  
324 approved by an appropriate institution and/or governmental agency that regulates research with  
325 animals, all research reported in this manuscript adhered to the legal requirements of the country  
326 in which the work took place, and that the research adhered to the American Society of  
327 Primatologists (ASP) Principles for the Ethical Treatment of Non Human Primates. Specifically,  
328 we gained permission from the Ghana Wildlife Division, the management committee at BFMS,  
329 and the University of Calgary's Animal Care Committee to conduct this study. Funding was  
330 granted by Alberta Ingenuity, American Society of Primatologists, International Primatological  
331 Society, Leakey Foundation, Natural Sciences and Engineering Research Council of Canada,  
332 Province of Alberta, Sweden-America Foundation, Wenner-Gren Foundation (8172), the  
333 University of Calgary, the University of Oregon's O'Day Fellowship Program in Biological  
334 Sciences and Office of the Vice President for Research and Innovation, and the National Institute  
335 of General Medical Sciences (P50GM098911) via the META Center for Systems Biology. We  
336 thank two anonymous reviewers for their helpful feedback.

337

338

## REFERENCES

339 Amaral, W. Z., Lubach, G. R., Proctor, A., Lyte, M., Phillips, G. J., & Coe, C. L. (2017). Social  
340 influences on prevotella and the gut microbiome of young monkeys. *Psychosomatic*  
341 *medicine*, 79(8), 888-897. <https://doi.org/10.1097/psy.0000000000000454>

- 342 Amato, K. (2013). Co-evolution in context: The importance of studying gut microbiomes in wild  
343 animals. *Microbiome Sci Med*, 1(1), 10-29. <https://doi.org/10.2478/micsm-2013-0002>
- 344 Amato, K. R., Leigh, S. R., Kent, A., Mackie, R. I., Yeoman, C. J., Stumpf, R. M., ... Garber, P.  
345 A. (2014). The Gut Microbiota Appears to Compensate for Seasonal Diet Variation in the Wild  
346 Black Howler Monkey (*Alouatta pigra*). *Microbial Ecology*, 69(2), 434–443.  
347 <https://doi.org/10.1007/s00248-014-0554-7>
- 348 Amato, K. R., Yeoman, C. J., Cerda, G., Schmitt, C. A., Cramer, J. D., Miller, M. E. B., ...  
349 Leigh, S. R. (2015). Variable responses of human and non-human primate gut microbiomes to a  
350 Western diet. *Microbiome*, 3, 53. <https://doi.org/10.1186/s40168-015-0120-7>
- 351 Amato, K. R., Martinez-Mota, R., Righini, N., Raguette-Schofield, M., Corcione, F. P., Marini, E.,  
352 ... & Williams, L. (2016). Phylogenetic and ecological factors impact the gut microbiota of two  
353 Neotropical primate species. *Oecologia*, 180(3), 717-733. [https://doi.org/10.1007/s00442-015-](https://doi.org/10.1007/s00442-015-3507-z)  
354 [3507-z](https://doi.org/10.1007/s00442-015-3507-z)
- 355 Amato, K. R., Van Belle, S., Di Fiore, A., Estrada, A., Stumpf, R., White, B., ... & Leigh, S. R.  
356 (2017). Patterns in Gut Microbiota Similarity Associated with Degree of Sociality among Sex  
357 Classes of a Neotropical Primate. *Microbial Ecology*, 74(1), 250–258.  
358 <https://doi.org/10.1007/s00248-017-0938-6>
- 359 Archie, E. A., & Tung, J. (2015). Social behavior and the microbiome. *Current Opinion in*  
360 *Behavioral Sciences*, 6, 28-34. <https://doi.org/10.1016/j.cobeha.2015.07.008>



- 361 Barbáchano, A., Fernández-Barral, A., Ferrer-Mayorga, G., Costales-Carrera, A., Larriba, M. J.,  
362 & Muñoz, A. (2017). The endocrine vitamin D system in the gut. *Molecular and cellular*  
363 *endocrinology*, 453, 79-87. <https://doi.org/10.1016/j.mce.2016.11.028>
- 364 Bădescu, I., Sicotte, P., Ting, N., & Wikberg, E. C. (2015). Female parity, maternal kinship,  
365 infant age and sex influence natal attraction and infant handling in a wild colobine (*Colobus*  
366 *vellerosus*). *American journal of primatology*, 77(4), 376-387. <https://doi.org/10.1002/ajp.22353>
- 367 Barelli, C., Albanese, D., Donati, C., Pindo, M., Dallago, C., Rovero, F., ... De Filippo, C.  
368 (2015). Habitat fragmentation is associated to gut microbiota diversity of an endangered primate:  
369 Implications for conservation. *Scientific Reports*, 5, 1–12. <https://doi.org/10.1038/srep14862>
- 370 Bennett, G., Malone, M., Sauther, M. L., Cuzzo, F. P., White, B., Nelson, K. E., ... & Amato, K.  
371 R. (2016). Host age, social group, and habitat type influence the gut microbiota of wild ring-  
372 tailed lemurs (*Lemur catta*). *American journal of primatology*, 78(8), 883-892.  
373 <https://doi.org/10.1002/ajp.22555>
- 374 Bolger, A. M., Lohse, M., & Usadel, B. (2014). Trimmomatic: a flexible trimmer for Illumina  
375 sequence data. *Bioinformatics*, 30(15), 2114-2120. <https://doi.org/10.1093/bioinformatics/btu170>
- 376 Bonte, D., Van Dyck, H., Bullock, J. M., Coulon, A., Delgado, M., Gibbs, M., ... & Schtickzelle,  
377 N. (2012). Costs of dispersal. *Biological Reviews*, 87(2), 290-312. <https://doi.org/10.1111/j.1469->  
378 [185X.2011.00201.x](https://doi.org/10.1111/j.1469-185X.2011.00201.x)
- 379 Cho, I., & Blaser, M. J. (2012). The human microbiome: at the interface of health and  
380 disease. *Nature Reviews Genetics*, 13(4), 260. <https://doi.org/10.1038/nrg3182>

- 381 Costello, E. K., Stagaman, K., Dethlefsen, L., Bohannan, B. J., & Relman, D. A. (2012). The  
382 application of ecological theory toward an understanding of the human  
383 microbiome. *Science*, 336(6086), 1255-1262. <https://doi.org/10.1126/science.1224203>
- 384 Degnan, P. H., Pusey, A. E., Lonsdorf, E. V, Goodall, J., Wroblewski, E. E., & Wilson, M. L.  
385 (2012). Factors associated with the diversification of the gut microbial communities within  
386 chimpanzees from Gombe National Park. *Proceedings of the National Academy of Sciences*  
387 (*USA*), 109, 13034–13039. <https://doi.org/10.1073/pnas.1110994109>
- 388 Derrien, M., Johan, E.T., & Vileg, H. (2015). Fate, activity, and impact of ingested bacteria  
389 within the human gut microbiota. *Trends in Microbiology*, 23(6), 354-66.  
390 <https://doi.org/10.1016/j.tim.2015.03.002>
- 391 Dunbar, R. I. M., MacCarron, P., & Robertson, C. (2018). Trade-off between fertility and  
392 predation risk drives a geometric sequence in the pattern of group sizes in baboons. *Biology*  
393 *letters*, 14(3), 20170700. <https://doi.org/10.1098/rsbl.2017.0700>
- 394 Ezenwa, V. O., Gerardo, N. M., Inouye, D. W., Medina, M., & Xavier, J. B. (2012). Animal  
395 behavior and the microbiome. *Science*, 338(6104), 198–199.  
396 <https://doi.org/10.1126/science.1227412>
- 397 Goodrich, J. K., Waters, J. L., Poole, A. C., Sutter, J. L., Koren, O., Blekhman, R., ... & Spector,  
398 T. D. (2014). Human genetics shape the gut microbiome. *Cell*, 159(4), 789-799.  
399 <https://doi.org/10.1016/j.cell.2014.09.053>

- 400 Grieneisen, L. E., Livermore, J., Alberts, S., Tung, J., & Archie, E. A. (2017). Group Living and  
401 Male Dispersal Predict the Core Gut Microbiome in Wild Baboons. *Integrative and Comparative*  
402 *Biology*, 0(0), 1–16. <https://doi.org/10.1093/icb/ix046>
- 403 Hale, V. L., Tan, C. L., Niu, K., Yang, Y., Knight, R., Zhang, Q., ... & Amato, K. R. (2018). Diet  
404 versus phylogeny: a comparison of gut microbiota in captive Colobine monkey  
405 species. *Microbial ecology*, 75(2), 515-527. <https://doi.org/10.1007/s00248-017-1041-8>
- 406 Hall, J. B., & Swaine, M. D. (2013). *Distribution and ecology of vascular plants in a tropical*  
407 *rain forest: forest vegetation in Ghana*(Vol. 1). Springer Science & Business Media.
- 408 Henzi, S. P., Lycett, J. E., & Weingrill, T. (1997). Cohort size and the allocation of social effort  
409 by female mountain baboons. *Animal Behaviour*, 54, 1235–1243.  
410 <https://doi.org/10.1006/anbe.1997.0520>
- 411 Huttenhower, C., Gevers, D., Knight, R., Abubucker, S., Badger, J. H., Chinwalla, A. T., ... &  
412 White, O. (2012). Structure, function and diversity of the healthy human microbiome. *Nature*,  
413 486(7402), 207–214. <https://doi.org/10.1038/nature11234>
- 414 Kankam, B. O., & Sicotte, P. (2013). The effect of forest fragment characteristics on abundance  
415 of *Colobus vellerosus* in the Forest-Savanna Transition Zone of Ghana. *Folia*  
416 *Primatologica*, 84(2), 74-86. <https://doi.org/10.1159/000348307>
- 417 Leamy, L. J., Kelly, S. A., Nietfeldt, J., Legge, R. M., Ma, F., Hua, K., ... & Pomp, D. (2014).  
418 Host genetics and diet, but not immunoglobulin A expression, converge to shape compositional

- 419 features of the gut microbiome in an advanced intercross population of mice. *Genome*  
420 *biology*, 15(12), 552. <https://doi.org/10.1186/s13059-014-0552-6>
- 421 Lombardo, M. P. (2008). Access to mutualistic endosymbiotic microbes: an underappreciated  
422 benefit of group living. *Behavioral Ecology and Sociobiology*, 62(4), 479-497.  
423 <https://doi.org/10.1007/s00265-007-0428-9>
- 424 Markham, A. C., Gesquiere, L. R., Alberts, S. C., & Altmann, J. (2015). Optimal group size in a  
425 highly social mammal. *Proceedings of the National Academy of Sciences*, 112(48), 14882-  
426 14887. <https://doi.org/10.1073/pnas.1517794112>
- 427 McCord, A. I., Chapman, C. A., Weny, G., Tumukunde, A., Hyeroba, D., Klotz, K., ... & Leigh,  
428 S. R. (2014). Fecal microbiomes of non-human primates in Western Uganda reveal species-  
429 specific communities largely resistant to habitat perturbation. *American journal of*  
430 *primatology*, 76(4), 347-354. <https://doi.org/10.1002/ajp.22238>
- 431 McMurdie, P. J., & Holmes, S. (2013). phyloseq: an R package for reproducible interactive  
432 analysis and graphics of microbiome census data. *PloS one*, 8(4), e61217.  
433 <https://doi.org/10.1371/journal.pone.0061217>
- 434 Moeller, A. H., Foerster, S., Wilson, M. L., Pusey, A. E., Hahn, B. H., & Ochman, H. (2016).  
435 Social behavior shapes the chimpanzee pan-microbiome. *Science Advances*, 2(1), e1500997.  
436 <https://doi.org/10.1126/sciadv.1500997>
- 437 Morin, P. A., Chambers, K. E., Boesch, C., & Vigilant, L. (2001). Quantitative polymerase chain  
438 reaction analysis of DNA from noninvasive samples for accurate microsatellite genotyping of

- 439 wild chimpanzees (*Pan troglodytes verus*). *Molecular ecology*, 10(7), 1835-1844.  
440 <https://doi.org/10.1046/j.0962-1083.2001.01308.x>
- 441 Muegge, B. D., Kuczynski, J., Knights, D., Clemente, J. C., González, A., Fontana, L., ... &  
442 Gordon, J. I. (2011). Diet drives convergence in gut microbiome functions across mammalian  
443 phylogeny and within humans. *Science*, 332(6032), 970-974.  
444 <https://doi.org/10.1126/science.1198719>
- 445 Perofsky, A. C., Lewis, R. J., Abondano, L. A., Di Fiore, A., & Meyers, L. A. (2017).  
446 Hierarchical social networks shape gut microbial composition in wild Verreaux's sifaka. *Proc. R.*  
447 *Soc. B*, 284(1868), 20172274. <https://doi.org/10.1098/rspb.2017.2274>
- 448 Rollins, L.A., Browning, L.E., Holleley, C.E., Savage, J.L., Russell, A.F., Griffith, S.C. (2012).  
449 Building genetic networks using relatedness information: a novel approach for the estimation of  
450 dispersal and characterization of group structure in social animals. *Mol. Ecol.* 21, 1727–1740.  
451 <https://doi.org/10.1111/j.1365-294X.2012.05492.x>
- 452 Saj, T. L., Teichroeb, J. A., & Sicotte, P. (2005). The population status of the ursine colobus  
453 (*Colobus vellerosus*) at Boabeng-Fiema, Ghana. *Commensalism and conflict: the human primate*  
454 *interface* (Paterson, JD & Wallis, J., eds). *American Society of Primatologists, Norman, OK*,  
455 350-375.
- 456 Saj, T. L., & Sicotte, P. (2007). Scramble competition among *Colobus vellerosus* at Boabeng-  
457 Fiema, Ghana. *International Journal of Primatology*, 28(2), 337-355.  
458 <https://doi.org/10.1007/s10764-007-9125-9>

- 459 Saj, T. L., & Sicotte, P. (2007). Predicting the competitive regime of female *Colobus vellerosus*  
460 from the distribution of food resources. *International Journal of Primatology*, 28(2), 315-336.  
461 <https://doi.org/10.1007/s10764-007-9124-x>
- 462 Segata, N., Izard, J., Waldron, L., Gevers, D., Miropolsky, L., Garrett, W. S., & Huttenhower, C.  
463 (2011). Metagenomic biomarker discovery and explanation. *Genome biology*, 12(6), R60.  
464 <https://doi.org/10.1186/gb-2011-12-6-r60>
- 465 Sicotte, P., & Macintosh, A. J. (2004). Inter-group encounters and male incursions in *Colobus*  
466 *vellerosus* in central Ghana. *Behaviour*, 141(5), 533-553.  
467 <https://doi.org/10.1163/1568539041166717>
- 468 Sicotte, P., Teichroeb, J. A., Vayro, J. V., Fox, S. A., Bădescu, I., & Wikberg, E. C. (2017). The  
469 influence of male takeovers on female dispersal in *Colobus vellerosus*. *American journal of*  
470 *primatology*, 79(7), e22436. <https://doi.org/10.1002/ajp.22436>
- 471 Snyder-Mackler, N., Alberts, S. C., & Bergman, T. J. (2014). The socio-genetics of a complex  
472 society: female gelada relatedness patterns mirror association patterns in a multilevel  
473 society. *Molecular ecology*, 23(24), 6179-6191. <https://doi.org/10.1111/mec.12987>
- 474 Spor, A., Koren, O., & Ley, R. (2011). Unravelling the effects of the environment and host  
475 genotype on the gut microbiome. *Nature Reviews Microbiology*, 9(4), 279.  
476 <https://doi.org/10.1038/nrmicro2540>
- 477 Springer, A., Fichtel, C., Al-Ghalith, G. A., Koch, F., Amato, K. R., Clayton, J. B., ... &  
478 Kappeler, P. M. (2017). Patterns of seasonality and group membership characterize the gut

- 479 microbiota in a longitudinal study of wild Verreaux's sifakas (*Propithecus verreauxi*). *Ecology*  
480 *and evolution*, 7(15), 5732-5745. <https://doi.org/10.1002/ece3.3148>
- 481 Strum, S. C. (2012). Darwin's monkey: Why baboons can't become human. *American journal of*  
482 *physical anthropology*, 149(S55), 3-23. <https://doi.org/10.1002/ajpa.22158>
- 483 Sueur, C., & Maire, A. (2014). Modelling animal group fission using social network  
484 dynamics. *PloS one*, 9(5), e97813. <https://doi.org/10.1371/journal.pone.0097813>
- 485 Teichroeb, J. A., Wikberg, E. C., & Sicotte, P. (2009). Female dispersal patterns in six groups of  
486 ursine colobus (*Colobus vellerosus*): infanticide avoidance is important. *Behaviour*, 146(4), 551-  
487 582. <https://doi.org/10.1163/156853909X426363>
- 488 Teichroeb, J. A., Wikberg, E. C., & Sicotte, P. (2011). Dispersal in male ursine colobus monkeys  
489 (*Colobus vellerosus*): influence of age, rank and contact with other groups on dispersal  
490 decisions. *Behaviour*, 148(7), 765-793. <https://doi.org/10.1163/000579511X577157>
- 491 Teichroeb, J. A., & Sicotte, P. (2012). Cost-free vigilance during feeding in folivorous primates?  
492 Examining the effect of predation risk, scramble competition, and infanticide threat on vigilance  
493 in ursine colobus monkeys (*Colobus vellerosus*). *Behavioral Ecology and Sociobiology*, 66(3),  
494 453–466. <https://doi.org/10.1007/s00265-011-1292-1>
- 495 Teichroeb, J. A., & Sicotte, P. (2018). Cascading competition: the seasonal strength of scramble  
496 influences between-group contest in a folivorous primate. *Behavioral Ecology and Sociobiology*,  
497 72(1), 6. <https://doi.org/10.1007/s00265-017-2418-x>

- 498 Tung, J., Barreiro, L. B., Burns, M. B., Grenier, J. C., Lynch, J., Grieneisen, L. E., ... & Archie,  
499 E. A. (2015). Social networks predict gut microbiome composition in wild baboons. *Elife*, 4,  
500 e05224. <https://doi.org/10.7554/eLife.05224.002>
- 501 Turnbaugh, P. J., Hamady, M., Yatsunencko, T., Cantarel, B. L., Duncan, A., Ley, R. E., ... &  
502 Egholm, M. (2009). A core gut microbiome in obese and lean twins. *Nature*, 457(7228), 480.  
503 <https://doi.org/10.1038/nature07540>
- 504 Wang, J. (2011). COANCESTRY: A program for simulating, estimating and analysing  
505 relatedness and inbreeding coefficients. *Molecular Ecology Resources*, 11, 141–145.  
506 <https://doi.org/10.1111/j.1755-0998.2010.02885.x>
- 507 Widdig, A., Nürnberg, P., Bercovitch, F. B., Trefilov, A., Berard, J. B., Kessler, M. J., ... &  
508 Krawczak, M. (2006). Consequences of group fission for the patterns of relatedness among  
509 rhesus macaques. *Molecular Ecology*, 15(12), 3825–3832. [https://doi.org/10.1111/j.1365-](https://doi.org/10.1111/j.1365-294X.2006.03039.x)  
510 [294X.2006.03039.x](https://doi.org/10.1111/j.1365-294X.2006.03039.x)
- 511 Wikberg, E. C., Sicotte, P., Campos, F. A., & Ting, N. (2012). Between-Group Variation in  
512 Female Dispersal, Kin Composition of Groups, and Proximity Patterns in a Black-and-White  
513 Colobus Monkey (*Colobus vellerosus*). *PLoS ONE*, 7(11), 1–14.  
514 <https://doi.org/10.1371/journal.pone.0048740>
- 515 Wikberg, E. C., Teichroeb, J. A., Bădescu, I., & Sicotte, P. (2013). Individualistic female  
516 dominance hierarchies with varying strength in a highly folivorous population of black-and-  
517 white colobus. *Behaviour*, 150(3-4), 295–320. <https://doi.org/10.1163/1568539X-00003050>



- 518 Wikberg, E. C., Ting, N., & Sicotte, P. (2014). Familiarity is more important than phenotypic  
519 similarity in shaping social relationships in a facultative female dispersed primate, *Colobus*  
520 *vellerosus*. *Behavioural processes*, 106, 27-35. <https://doi.org/10.1016/j.beproc.2014.04.002>
- 521 Wikberg, E. C., Ting, N., & Sicotte, P. (2014). Kinship and similarity in residency status  
522 structure female social networks in black-and-white colobus monkeys (*Colobus*  
523 *vellerosus*). *American Journal of Physical Anthropology*, 153(3), 365-376.  
524 <https://doi.org/10.1002/ajpa.22435>
- 525 Wikberg, E. C., Ting, N., & Sicotte, P. (2015). Demographic Factors Are Associated with  
526 Intergroup Variation in the Grooming Networks of Female *Colobus (Colobus vellerosus)*.  
527 *International Journal of Primatology*, 36(1), 124–142. [https://doi.org/10.1007/s10764-015-9816-](https://doi.org/10.1007/s10764-015-9816-6)  
528 6
- 529 Wikberg, E.C., Christie, D.M., Sicotte, P., & Ting, N. (2017, August 21-27). Between and within  
530 group variation in the gut microbiome of a black-and-white colobus monkey (*Colobus*  
531 *vellerosus*). Paper presented at the *International Primatological Society Congress*.
- 532 Wikberg, E. C., Christie, D.M., Campos, F. A., Sicotte, P., & Ting, N. (2017). The link between  
533 social networks and gut microbial composition in black-and-white colobus (*Colobus*  
534 *vellerosus*). In *American Journal of Physical Anthropology*, 162(S64), 409-409.
- 535 Williams, B.L., Hornig, M., Parekh, T., Lipkin, W.I. (2012). Application of novel PCR-based  
536 methods for detection, quantitation, and phylogenetic characterization of *Sutterella* species in  
537 intestinal biopsy samples from children with autism and gastro-intestinal disturbances. *mBio* 3,  
538 e00261–11. <https://doi.org/10.1128/mBio.00261-11>

- 539 Wong, S. N. P., & Sicotte, P. (2006). Population size and density of *Colobus vellerosus* at the  
540 Boabeng-Fiema Monkey Sanctuary and surrounding forest fragments in Ghana. *American*  
541 *Journal of Primatology*, 68, 465–476. <https://doi.org/10.1002/ajp.20242>
- 542 Wu, G. D., Chen, J., Hoffmann, C., Bittinger, K., Chen, Y. Y., Keilbaugh, S. A., ... & Sinha, R.  
543 (2011). Linking long-term dietary patterns with gut microbial enterotypes. *Science*, 334(6052),  
544 105-108. <https://doi.org/10.1126/science.1208344>
- 545 Yildirim, S., Yeoman, C. J., Sipos, M., Torralba, M., Wilson, B. A., Goldberg, T. L., ... &  
546 Nelson, K. E. (2010). Characterization of the fecal microbiome from non-human wild primates  
547 reveals species specific microbial communities. *PloS one*, 5(11), e13963.  
548 <https://doi.org/10.1371/journal.pone.0013963>

549

550

551

## TABLES

|                 | Males                 |           |         | Females               |           |         | Total |
|-----------------|-----------------------|-----------|---------|-----------------------|-----------|---------|-------|
|                 | Adults +<br>Subadults | Juveniles | Infants | Adults +<br>Subadults | Juveniles | Infants |       |
| Pre-fission DA  | 9                     | 0         | 2       | 12                    | 4         | 1       | 28    |
| Post-fission DA | 5                     | 2         | 1       | 7                     | 3         | 0       | 18    |
| Post-fission NP | 1                     | 0         | 2       | 6                     | 0         | 1       | 10    |

552

- 553 Table 1. Composition of the different social groups before and after the fission event. Although  
554 this study only examined the gut microbial compositions of females, males are included in this  
555 table for insight into group composition overall.

556

557

## FIGURES

558

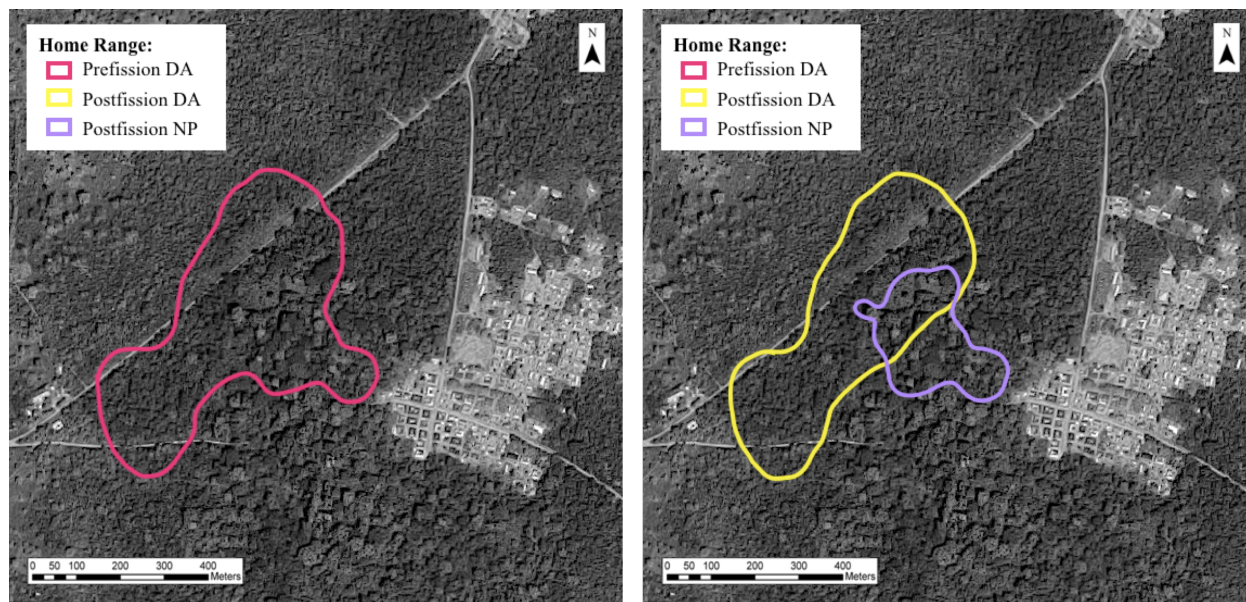

559

560 Figure 1. Home range distributions of the DA and NP groups prior to and after the fission event.

561 (A) The original DA group maintained a large home range in the summer of 2006. (B) The two

562 product groups split the original home range by the summer of 2007.

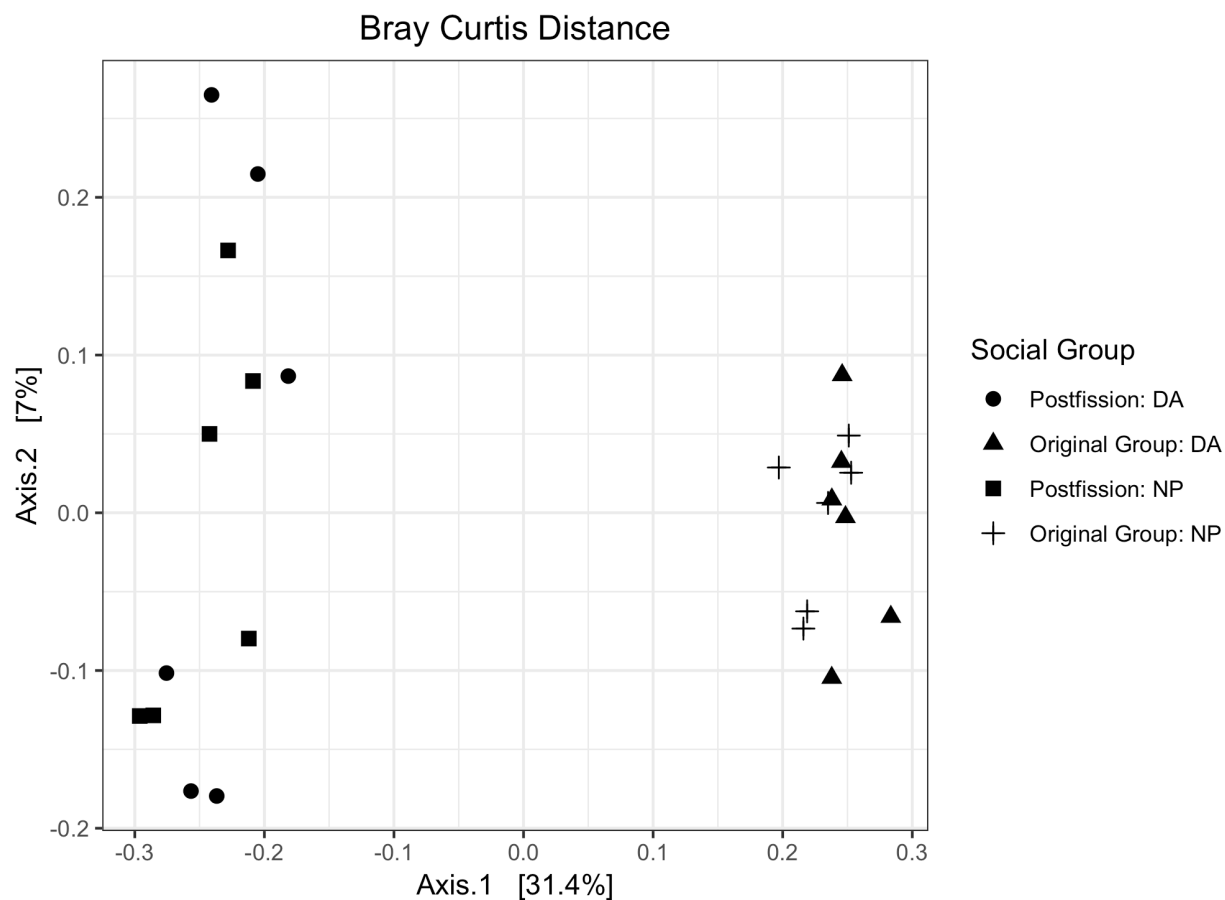

563

564 Figure 2. Post-fission group membership predicts Bray-Curtis dissimilarity of the NP and DA  
565 groups. No significant difference in gut microbial diversity was observed prior to the fission  
566 event ( $p = 0.085$ ,  $n = 12$ , pseudo  $F = 1.23$ ), while less than nine months after the fission event  
567 these groups showed unique microbial signatures ( $p = 0.02$ ,  $n = 12$ , pseudo  $F = 1.62$ ). Significant  
568 differences were found in gut microbial diversity between all groups across the years sampled ( $p$   
569  $< 0.01$ ,  $n = 24$ , pseudo  $F = 2.19$ ).

570

571

572

573

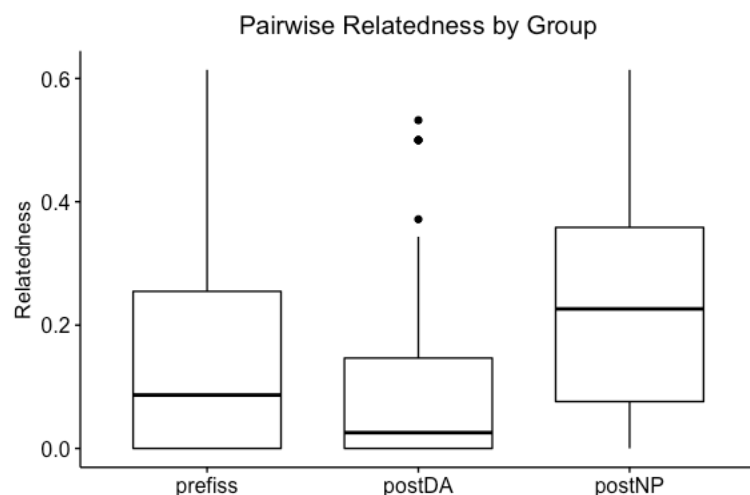

574 Figure 3. Pairwise-relatedness as calculated using 17 STR loci are represented by social group.  
575

576 On average, pairwise-relatedness increased by 0.079 in the NP social group from the original  
577 group. However, the pairwise-relatedness between groups was not statistically different  
578 ( $p=0.103$ ,  $df=2$ ,  $\chi^2=4.55$ ).

579

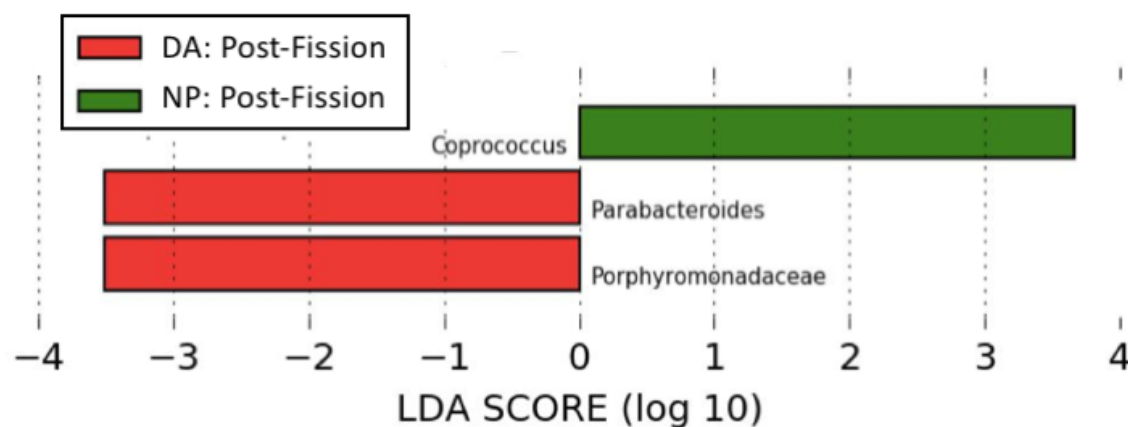

580

581 Figure 4. LDA scores for taxa differing significantly between product group. Three genera were  
582 found in different relative abundance between these two groups. Linear effect size analysis  
583 (LefSe) was run for the groups at a KW alpha value of 0.01 and an LDA score of 3.0.
